# Supplementary material for: Imaging mass spectrometry and MS/MS molecular networking reveals chemical interactions among cuticular bacteria and pathogenic fungi associated with fungus-growing ants
Source: PubMed Central journal article supplement (PMC5514151; doi:10.1038/s41598-017-05515-6), 2017-07-17
Supplement: 41598_2017_5515_MOESM1_ESM.pdf [file 41598_2017_5515_MOESM1_ESM.pdf]

## Supplementary Information

# Imaging mass spectrometry and MS/MS molecular networking reveals chemical interactions among cuticular bacteria and pathogenic fungi associated with fungus-growing ants

**Cristopher A. Boya P.<sup>1,2</sup>, Hermógenes Fernández-Marín<sup>1</sup>, Luis C. Mejía<sup>1</sup>, Carmenza Spadafora<sup>3</sup>, Pieter C. Dorrestein<sup>4,5</sup>, and Marcelino Gutiérrez Guevara<sup>1,\*</sup>**

<sup>1</sup>Centro de Biodiversidad y Descubrimiento de Drogas, Instituto de Investigaciones Científicas y Servicios de Alta Tecnología (INDICASAT-AIP), Panamá, Apartado 0843-01103, República de Panamá;

<sup>2</sup>Department of Biotechnology, Acharya Nagarjuna University, Guntur, Nagarjuna Nagar-522 510, India.

<sup>3</sup>Centro de Biología Celular y Molecular de Enfermedades, INDICASAT-AIP, Panamá, Apartado 0843-01103, República de Panamá

<sup>4</sup>Collaborative Mass Spectrometry Innovation Center, Skaggs School of Pharmacy and Pharmaceutical Sciences, University of California at San Diego, San Diego, California 92093, United States

<sup>5</sup>Department of Pharmacology, University of California at San Diego, San Diego, California 92093, United States

\*[mgutierrez@indicasat.org.pa](mailto:mgutierrez@indicasat.org.pa)

# Contents

## Supplementary Methods

- Breast cancer bioassay
- *P. falciparum* bioassay
- *T. cruzi* bioassay
- Antibiotic susceptibility test
- Antifungal bioassay

## Supplementary Figures

- **Figure S1.** MALDI imaging mass spectrometry experiment of the interaction between the bacterium *Streptomyces* CBR53 and the fungus *Escovopsis* TZ49, showing ions from 50 *m/z* to 800 *m/z*
- **Figure S2.** MALDI imaging mass spectrometry experiment of the interaction between the bacterium *Streptomyces* CBR53 and the fungus *Escovopsis* TZ49, showing ions from 800 *m/z* to 2500 *m/z*
- **Figure S3.** Proton NMR spectra of elaiophylin macrolide, <sup>1</sup>H NMR (400 MHz, METHANOL-*d*<sub>3</sub>)
- **Figure S4.** Carbon NMR spectra of elaiophylin macrolide, <sup>13</sup>C NMR (100 MHz, METHANOL-*d*<sub>3</sub>)
- **Figure S5.** Direct MS-MS comparison of elaiophylin macrolide from the extract of *Streptomyces* sp. (CBR53) with elaiophylin-CDM bronze spectrum from GNPS spectral library (CCMSLIB00000479766)
- **Figure S6.** Efomycin G from the extract of *Streptomyces* CBR53.
- **Figure S7.** Efomycin A from the extract of *Streptomyces* CBR53.
- **Figure S8.** MS-MS comparison of unknown peaks 1065.6007, 1079.6139 and 1093.6222 from the extract of *Streptomyces* CBR53, with elaiophylin-CDM bronze spectrum from GNPS spectral library (CCMSLIB00000479766).
- **Figure S9.** Direct MS-MS comparison of shearinine D from the extract of *Escovopsis* TZ49 with silver spectrum of Shearinine D\_130028 from GNPS spectral library (CCMSLIB00000478461)
- **Figure S10.** Direct MS-MS comparison of shearinine F from the extract of *Escovopsis* TZ49 with silver spectrum of Shearinine F\_120146 from GNPS spectral library (CCMSLIB00000478066)
- **Figure S11:** MALDI imaging mass spectrometry experiment of the interaction between the bacterium *Streptomyces* CBR38 and the fungus *Escovopsis* Acro424, showing ions from 50 *m/z* to 2500 *m/z*
- **Figure S12:** Direct MS-MS comparison of actinomycin D from the extract of *Streptomyces* CBR38 with actinomycin D gold spectrum from GNPS spectral library (CCMSLIB00000006871)
- **Figure S13:** Direct MS-MS comparison of actinomycin X2 from the extract of *Streptomyces* CBR38 with actinomycin X2 gold spectrum from GNPS spectral library (CCMSLIB00000577607)

- **Figure S14.** Direct MS-MS comparison of ion 1271.6415 from the extract of *Streptomyces* CBR38

#### **Supplementary Tables**

- **Table S1.**  $^{13}\text{C}$  and  $^1\text{H}$  NMR Chemical shifts of compound 1 (400 MHz, DMSO-d<sub>6</sub>,  $\delta$  in ppm relative to solvent) and elaiophylin data from literature<sup>1</sup> (360 MHz, DMSO-d<sub>6</sub>,  $\delta$  in ppm relative to internal TMS)

## Supplementary Methods

### ***Breast cancer bioassay***

Activity against the human breast cancer cell line MCF-7 (ATCC, Manassas, VA, USA) was done as described by Higginbotham et al.<sup>2</sup>. In short, the cells were incubated with RPMI-1640 supplemented with gentamicin, L-glutamine, NaHCO<sub>3</sub>, HEPES buffer, and FBS at 37°C. Compound was diluted in RPMI-1640 media, added to the cells, and incubated for 48 h at 37°C. After the cells were fixed with trichloroacetic acid, rinsed with water and treated with sulphorhodamine B, the mixture was allowed to react for 15–30 min at 22°C. Then the cells were rinsed with trichloroacetic acid, dried, and treated with Tris-HCl (10 mM; pH 7) for 15 min. Finally color intensity was read at 570 nm, in a color plate reader (Benchmark Bio-Rad). Adriamycin diluted in DMSO was used as positive control (normal IC<sub>50</sub> value 20–50 nM).

### ***Plasmodium falciparum bioassay***

Activity against the causative agent of malaria was performed by culturing human erythrocytes and infecting them with *P. falciparum*, as described by Trager and Jensen, 1976<sup>3</sup>. Briefly, the HB3 (Chloroquine sensitive) strain of *P. falciparum* was cultured in RPMI 1640, supplemented with 10% human serum (from O+ blood) at a hematocrit of 2% human erythrocytes (O+) at 37°C in a gas mixture of 5% CO<sub>2</sub>, 5% O<sub>2</sub>, and 90% N<sub>2</sub>. Parasites were kept in the same phase of the life cycle through synchronization in a temperature cycling incubator<sup>4</sup>. The parasites were initially tested with 10 µg/mL of the extract containing the compound, while the IC<sub>50</sub> was obtained by adding no more than 10% v/v of the compound to the well, at different concentrations. The culture was incubated further for 24 h after which PicoGreen DNA fluorescent dye (Invitrogen, USA) was added to a final concentration of 1%. After 30 min incubation the signal was read on a fluorescence plate reader<sup>5</sup>. Chloroquine was used as reference positive control (average IC<sub>50</sub>: 24.3 nM).

### ***Trypanosoma cruzi bioassay***

Activity against the causative agent of Chagas disease was performed using a colorimetric method, assessing Tulahuen LacZ clone C4 of *T. cruzi* parasites expressing β galactosidase (ATCC, Manassas, VA, USA)<sup>6</sup>. Concisely, assays were performed in duplicate on amastigotes culture in RPMI-1640 supplemented with L-glutamine, HEPES buffer, NaHCO<sub>3</sub>, dilution of a penicillin-streptomycin mix (1:100) and FBS at 37°C, then exposed to different concentrations of the test compounds under an atmosphere of 5% CO<sub>2</sub>/95% air<sup>2</sup>. Cleavage of chlorophenol red-β-D-galactoside (CPRG, Roche Applied Science) by β-Gal expressed by the parasite was measured at 570 nm to

detect color intensity, in a color plate reader (Benchmark Bio-Rad). Nifurtimox diluted in RPMI-1640 medium was used as a positive control ( $IC_{50}$  0.15–13.4  $\mu$ M)<sup>2,6,7</sup>.

### ***Antibiotic susceptibility test***

Assays against strains of *Candida albicans* (ATCC® 10231™), *Staphylococcus aureus* subsp. *aureus* (ATCC® 43300™) and *Bacillus subtilis* subsp. *subtilis* (ATCC® 6051™) were performed using disk diffusion test, in duplicate as described by Boned<sup>8</sup> with some modifications<sup>9</sup>. Briefly, petri dishes with Müller-Hinton agar were inoculated with a suspension of each test organism equivalent to 0.5 McFarland solutions, followed by the application of 6 mm papers disk on the surface of the agar and then impregnated with 25  $\mu$ L of the compound at a concentration of 1024, 768, 512, 384, 256 and 128  $\mu$ g/mL. Petri dishes were incubated at 30°C for 18-24 hours before inhibitions zone were measured. MIC values were determined using regression analysis of inhibition zones, considering the absorptive model of diffusion<sup>8</sup>.

### ***Antifungal bioassay***

Assays against fungal strains *Escovopsis sp.* (CBR53 and CBR38), *A. fumigatus* (ATCC® 1028™) were performed in duplicate using 6 mm papers disk containing three different concentrations of the compounds (1024, 512, and 256  $\mu$ g/MI). Hyphae plugs of fungal strains were placed in the center of the petri dishes containing Müller-Hinton agar and incubated at 30°C, evaluation of inhibition zones were carried out at 24, 48, 72, 96 and 120 hours<sup>10</sup>.

## Supplementary Figures

**Figure S1.** MALDI imaging mass spectrometry experiment of the interaction between the bacterium *Streptomyces* CBR53 and the fungus *Escovopsis* TZ49, showing ions from 50 m/z to 800 m/z

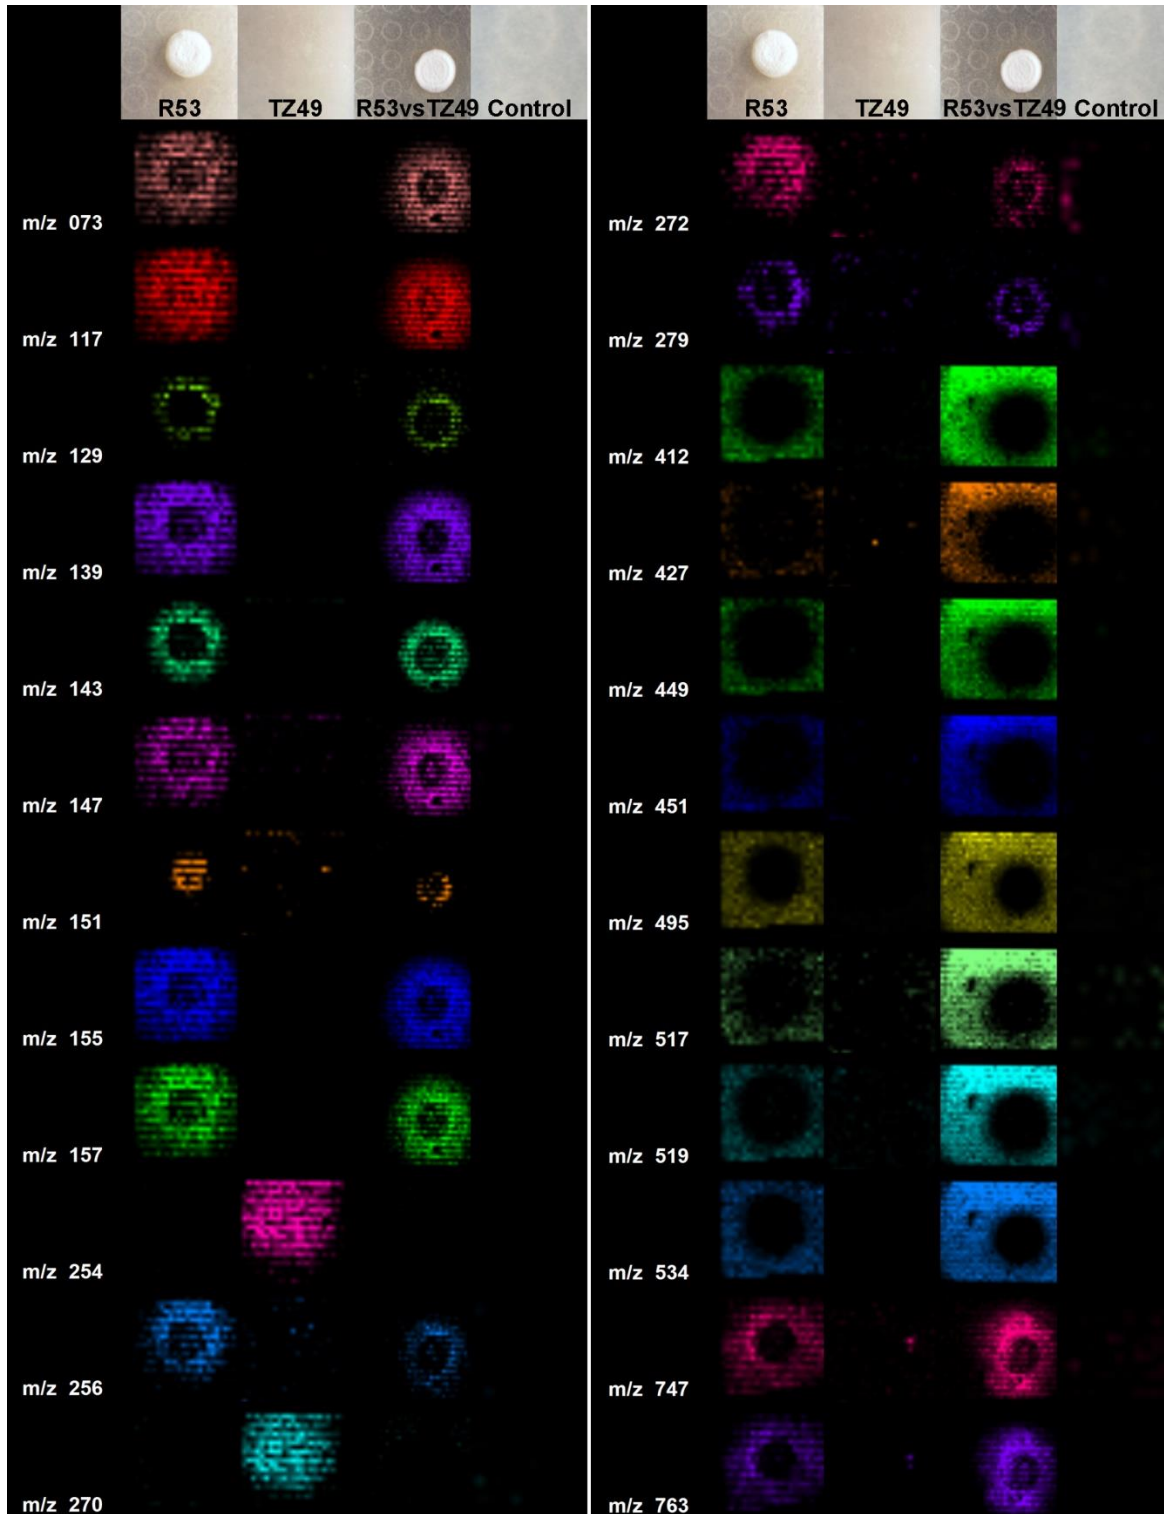

**Figure S2.** MALDI imaging mass spectrometry experiment of the interaction between the bacterium *Streptomyces* CBR53 and the fungus *Escovopsis* TZ49, showing ions from 800 m/z to 2500 m/z

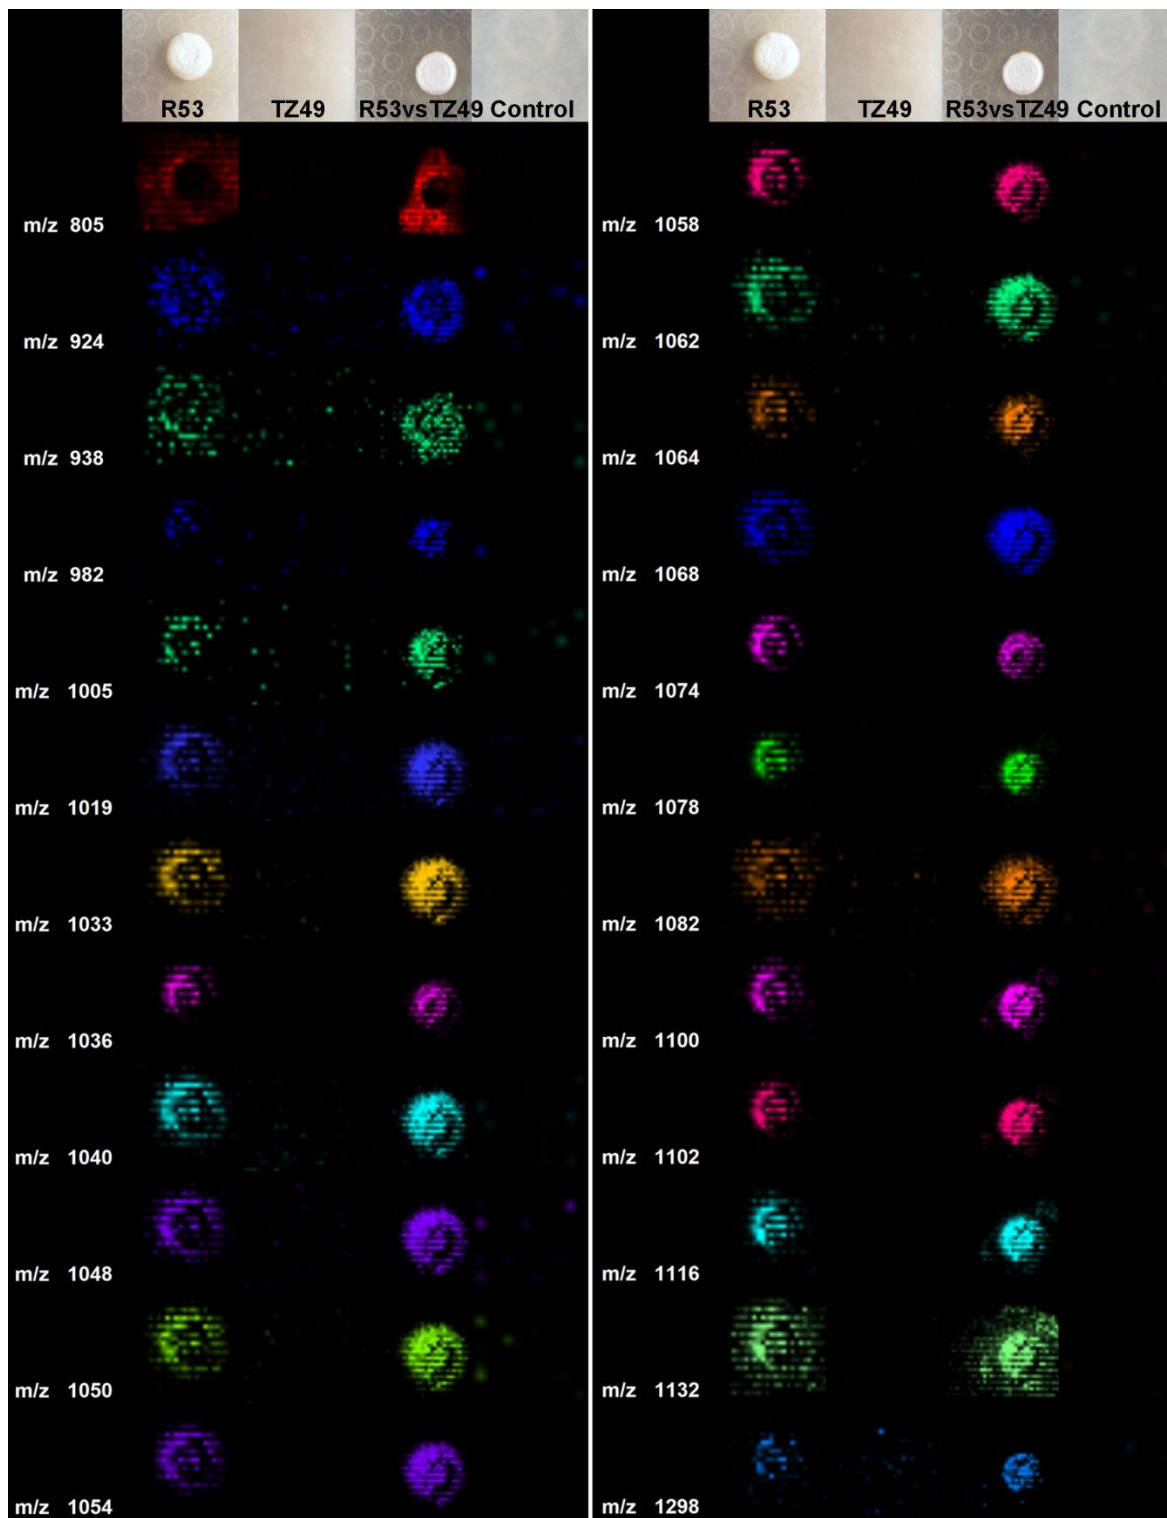

**Figure S3.**  $^1\text{H-NMR}$  spectra of elaiophylin (400 MHz, DMSO-d6)

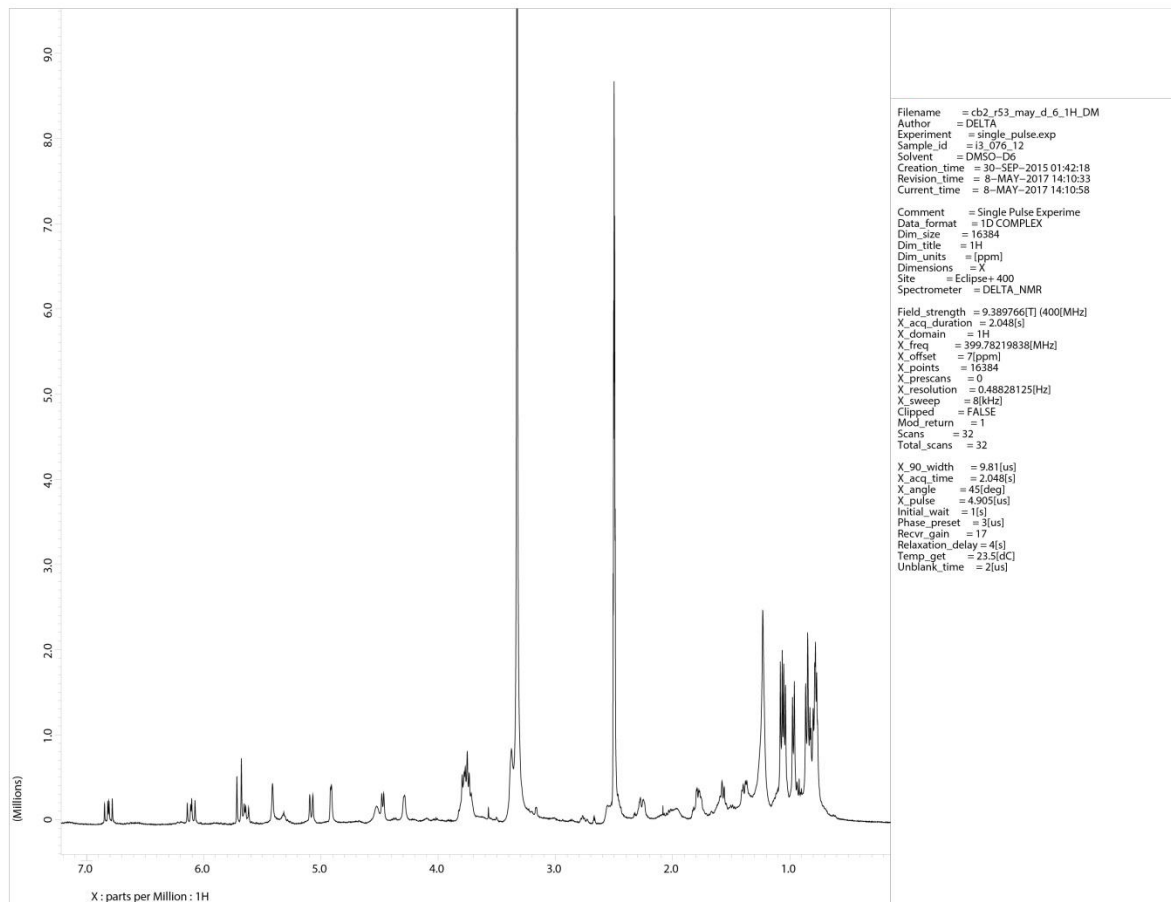



Figure S4.  $^{13}\text{C}$ -NMR spectra of elaiophyllin (100 MHz, DMSO-d6)

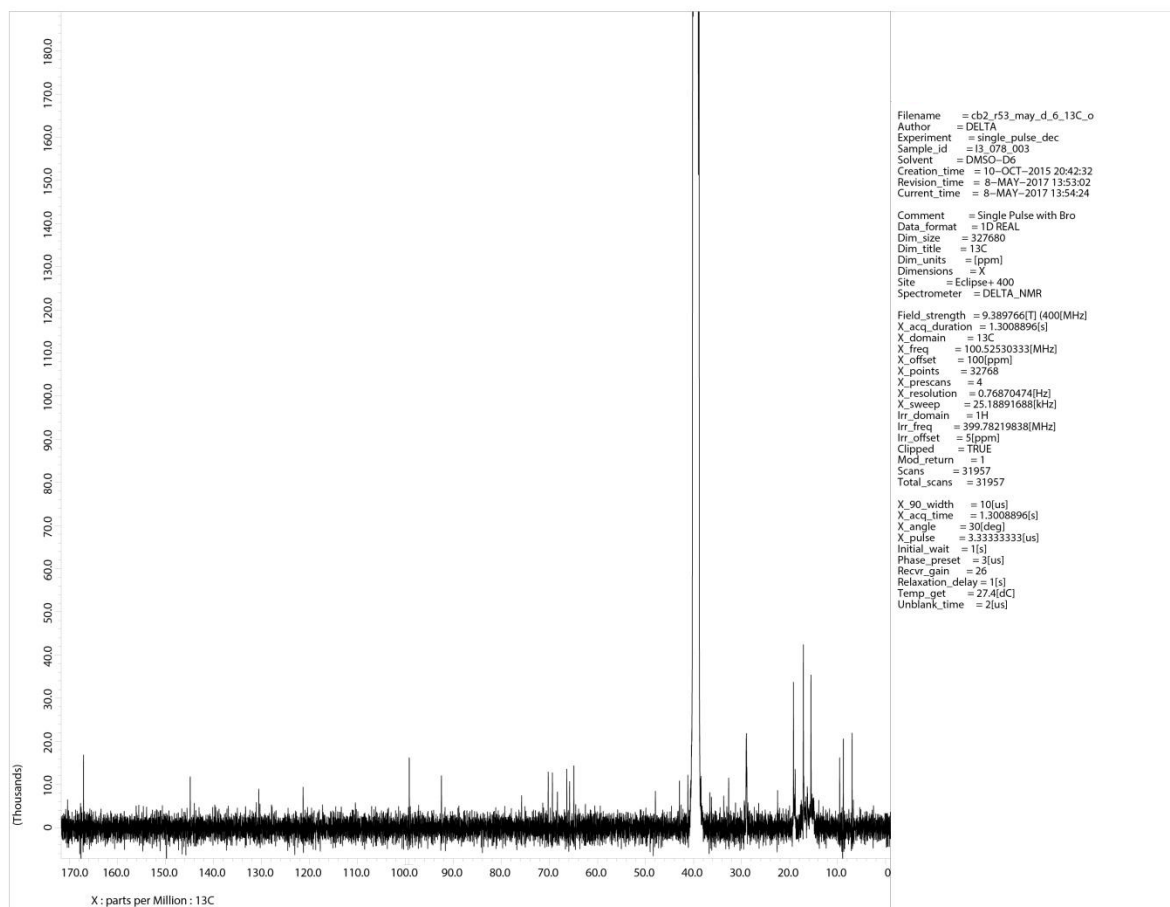



**Figure S6.** Efomycin G from the extract of *Streptomyces* CBR53. The spectrum show three mayor fragment ions: 411.1819 m/z which correspond to the aglycone; and the ions 715.3734, 729.3860 m/z, which indicate a cleavage of the nonsymmetrical groups between carbons 9-10. and 9''-10''.

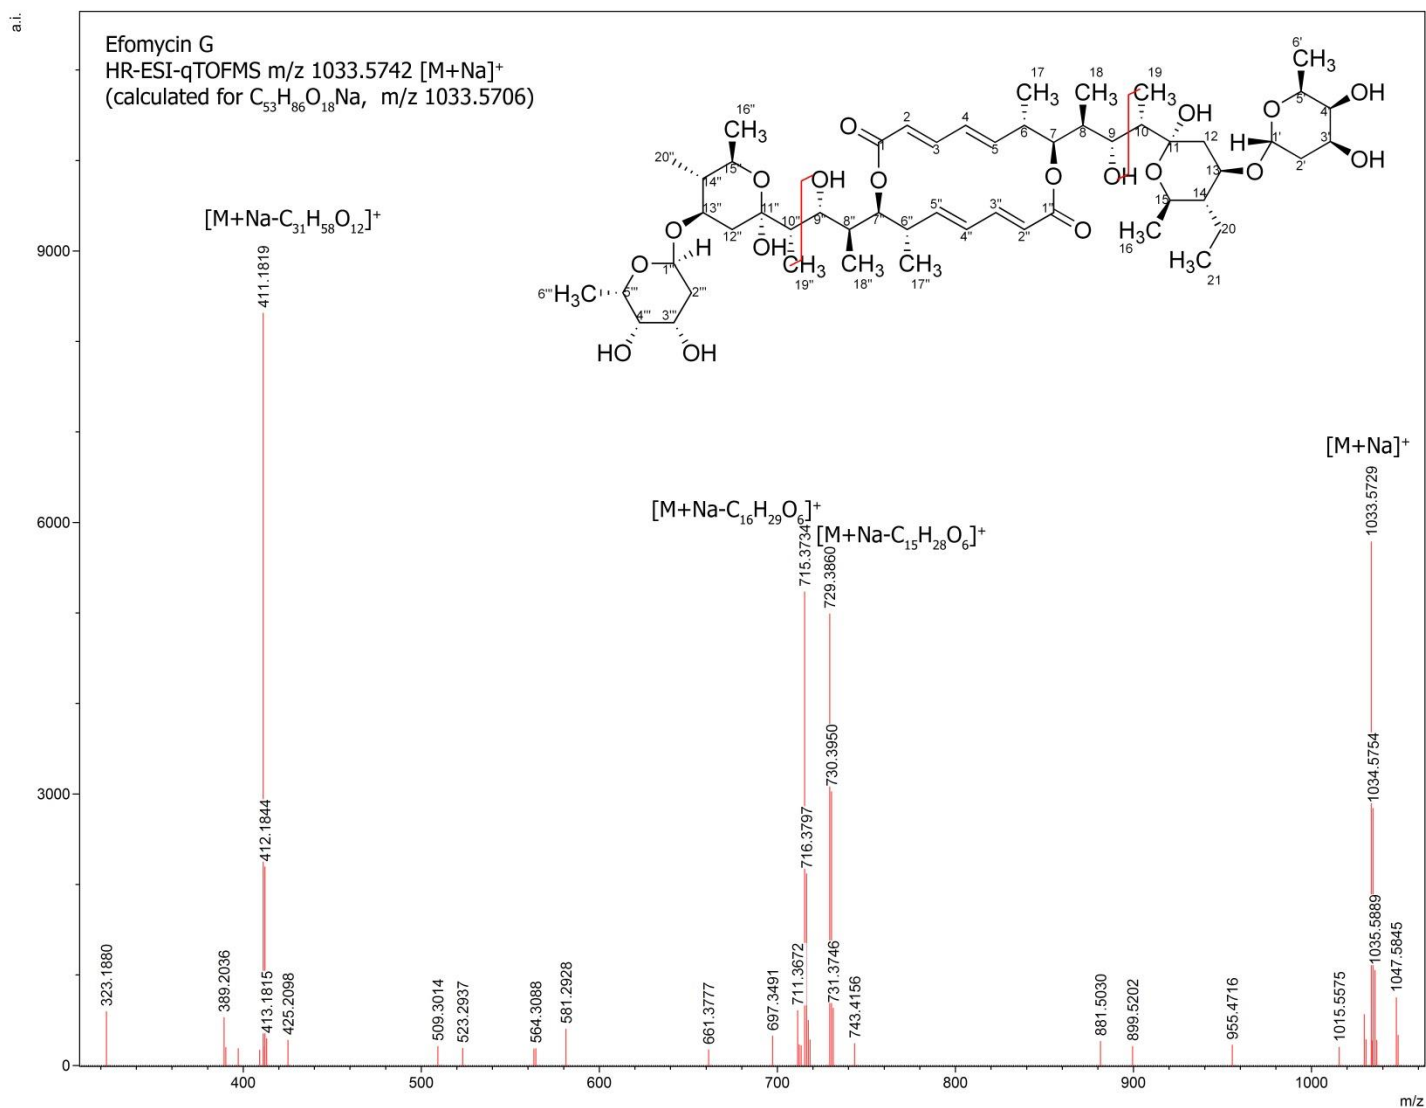

**Figure S7.** Efomycin A from the extract of *Streptomyces* CBR53. The spectrum show three mayor fragment ions: 411.1800 m/z which correspond to the aglycone; and the ions 743.3699, 729.3763 m/z, which indicate a cleavage of the nonsymmetrical groups between carbon 9-10 and 9''-10''.

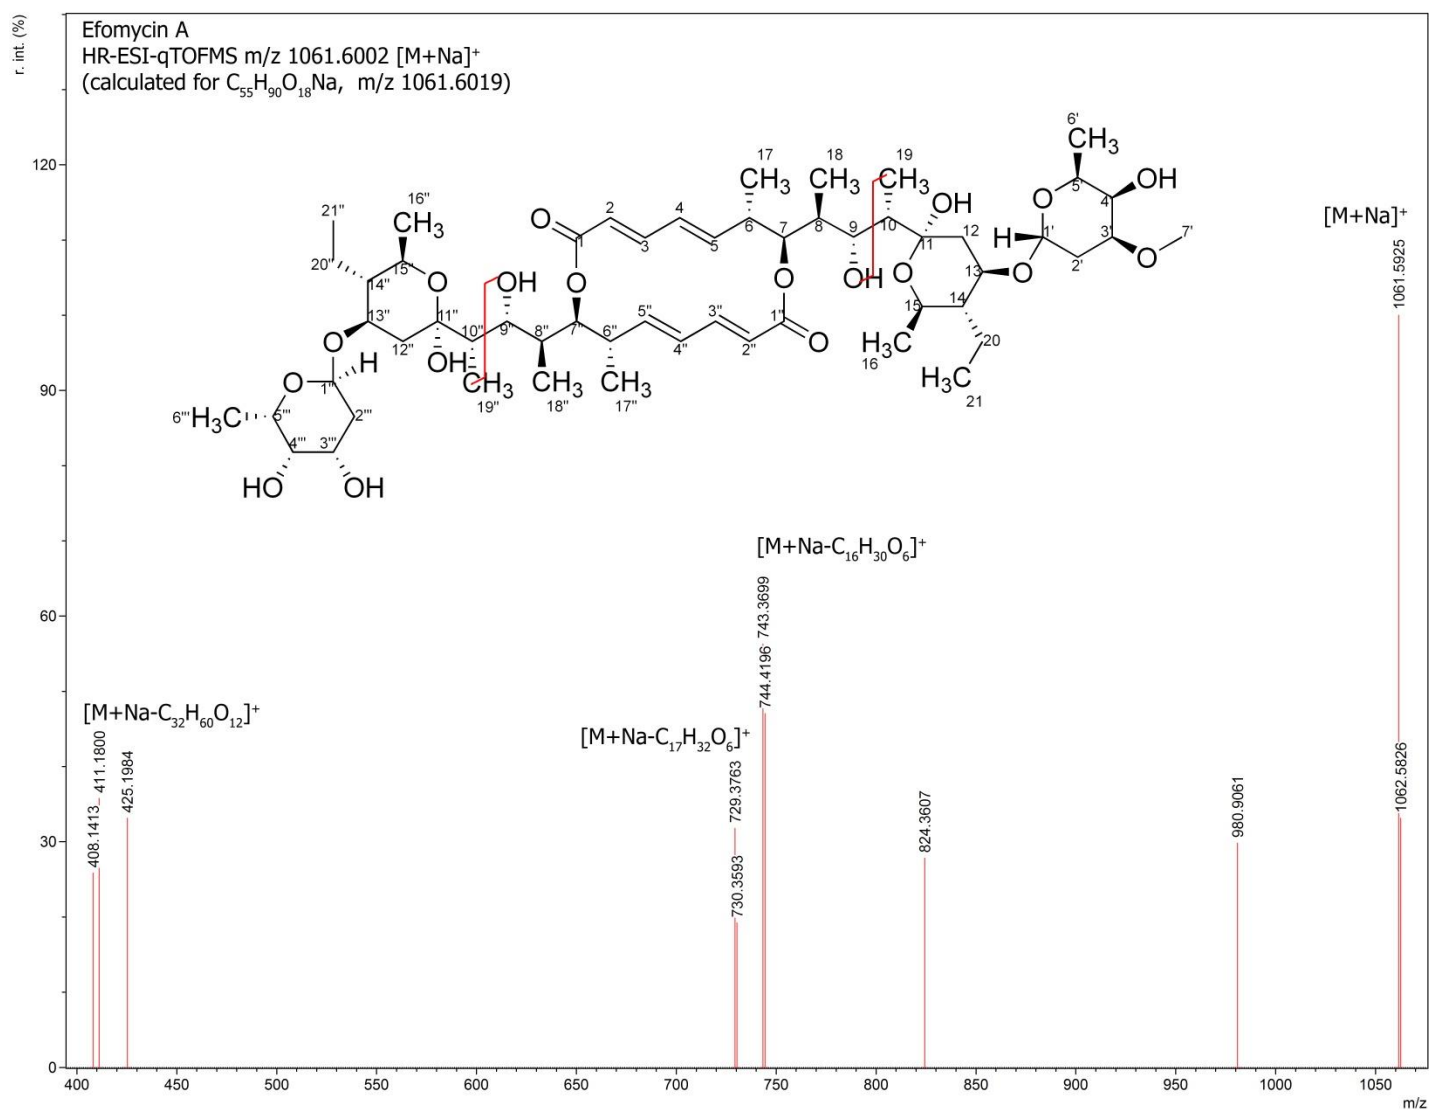

**Figure S8.** MS-MS comparison of unknown nodes 1065.6007, 1079.6139 and 1093.6222 from the extract of *Streptomyces* CBR53, with elaiophylin-CDM bronze spectrum from GNPS spectral library (CCMSLIB00000479766). Spectra show chemical shifts of 18, 32 and 46 Dalton related to elaiophylin.

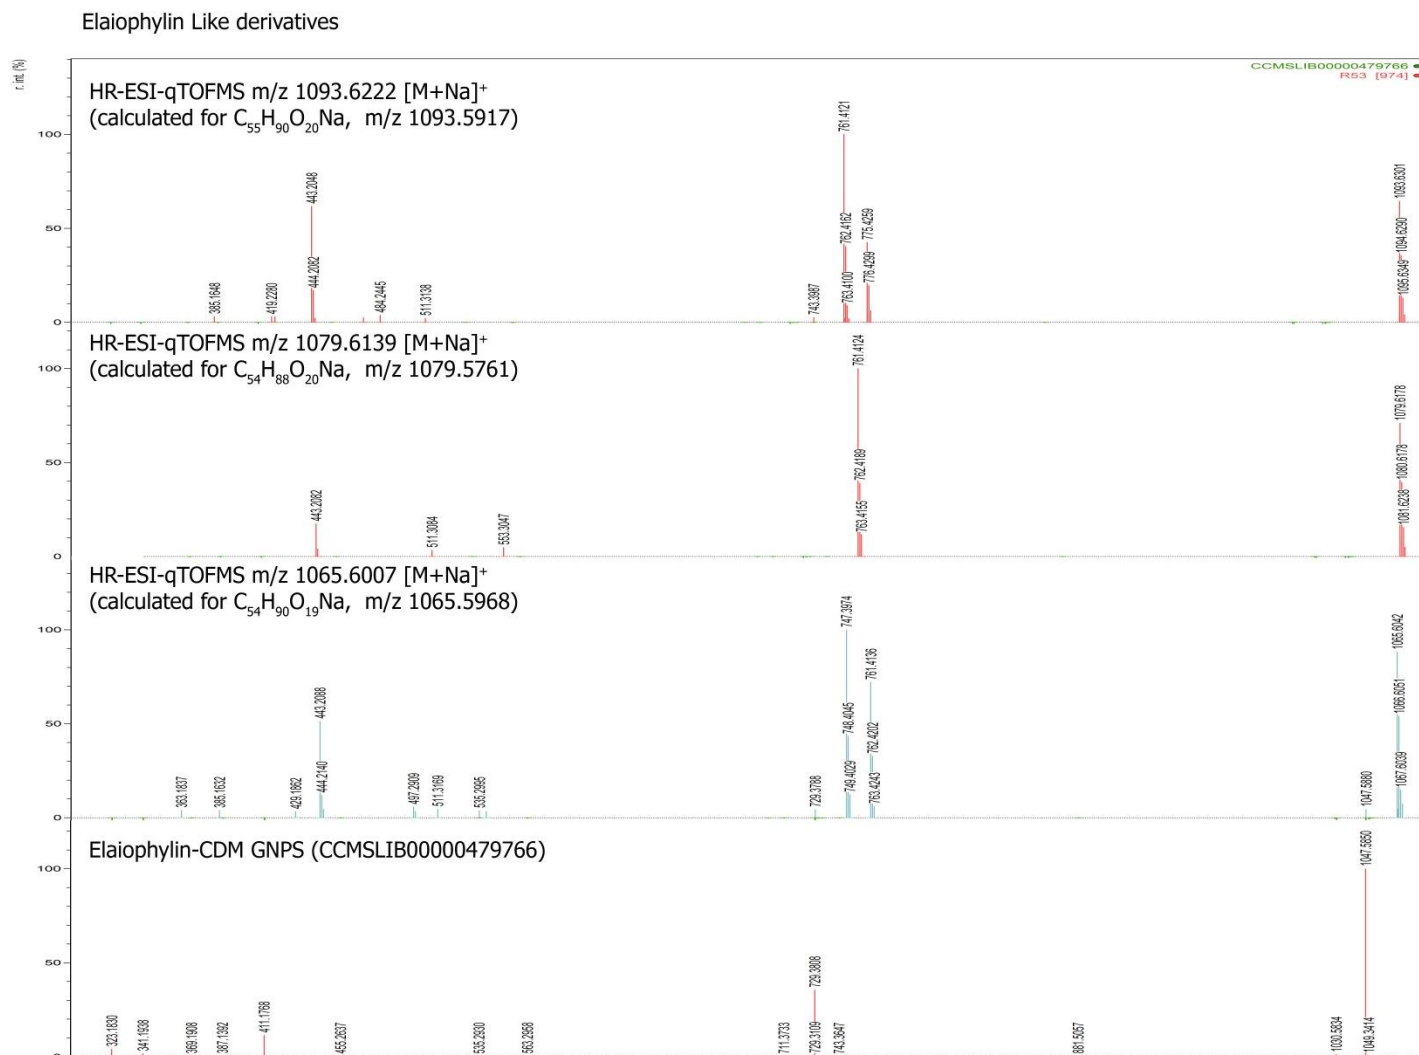

**Figure S9.** Direct MS-MS comparison of shearinine D from the extract of *Escovopsis* TZ49 with silver spectrum of Shearinine D\_130028 from GNPS spectral library (CCMSLIB00000478461)

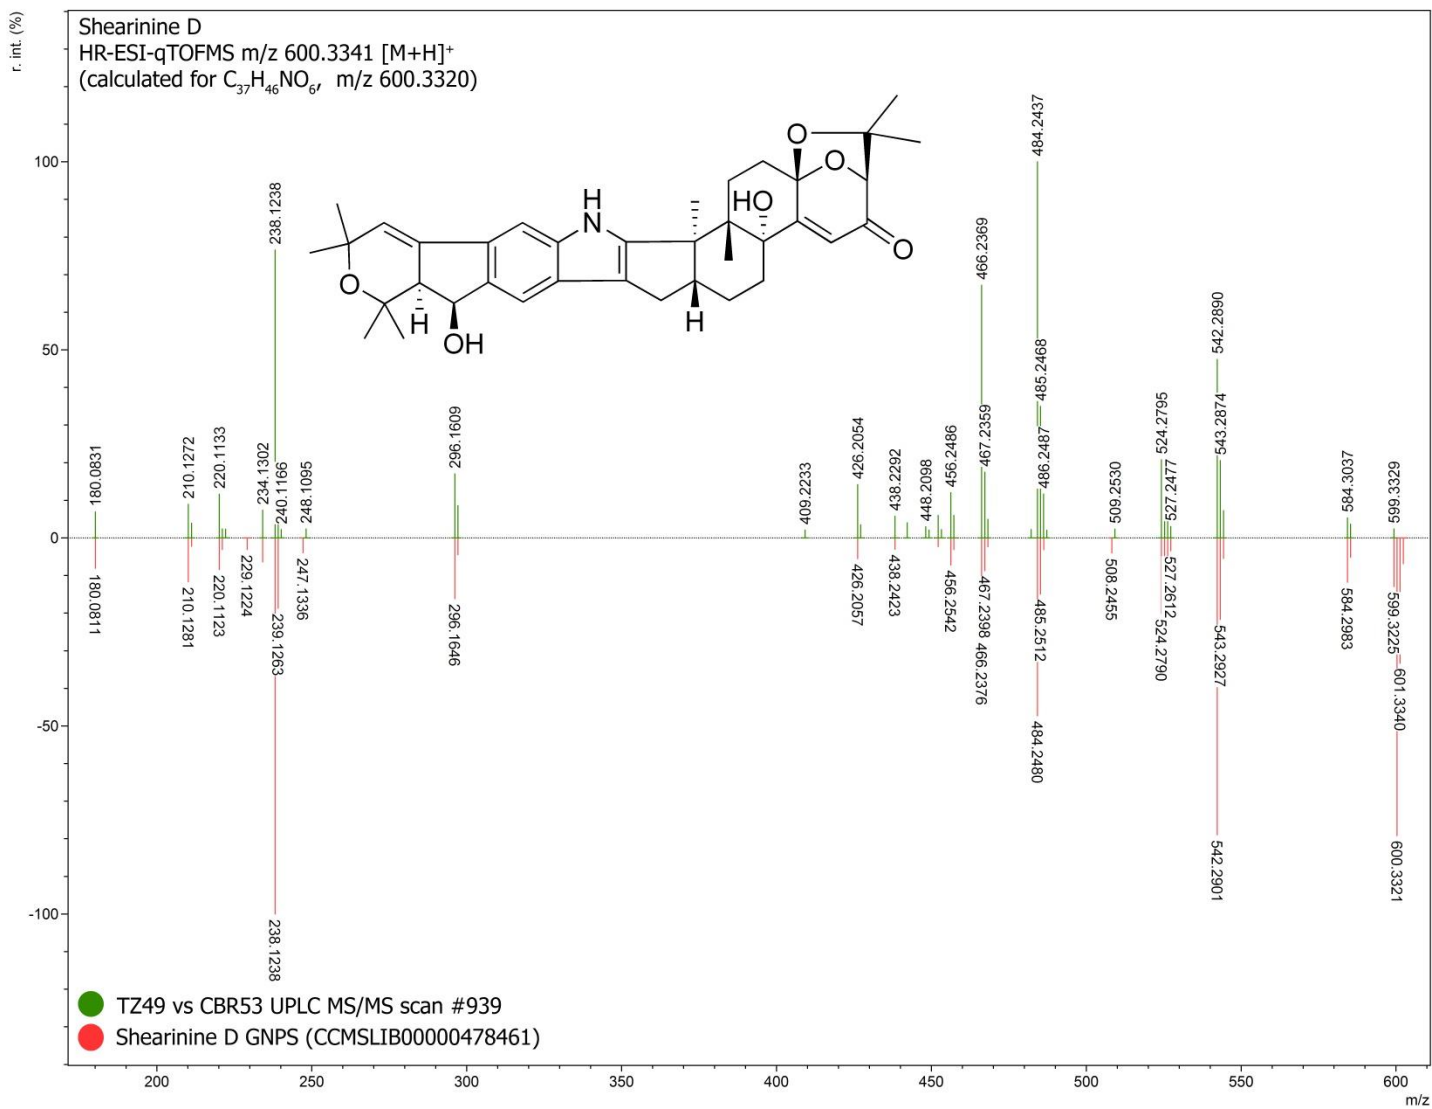

**Figure S10.** Direct MS-MS comparison of shearinine F from the extract of *Escovopsis* TZ49 with silver spectrum of Shearinine F\_120146 from GNPS spectral library (CCMSLIB00000478066)

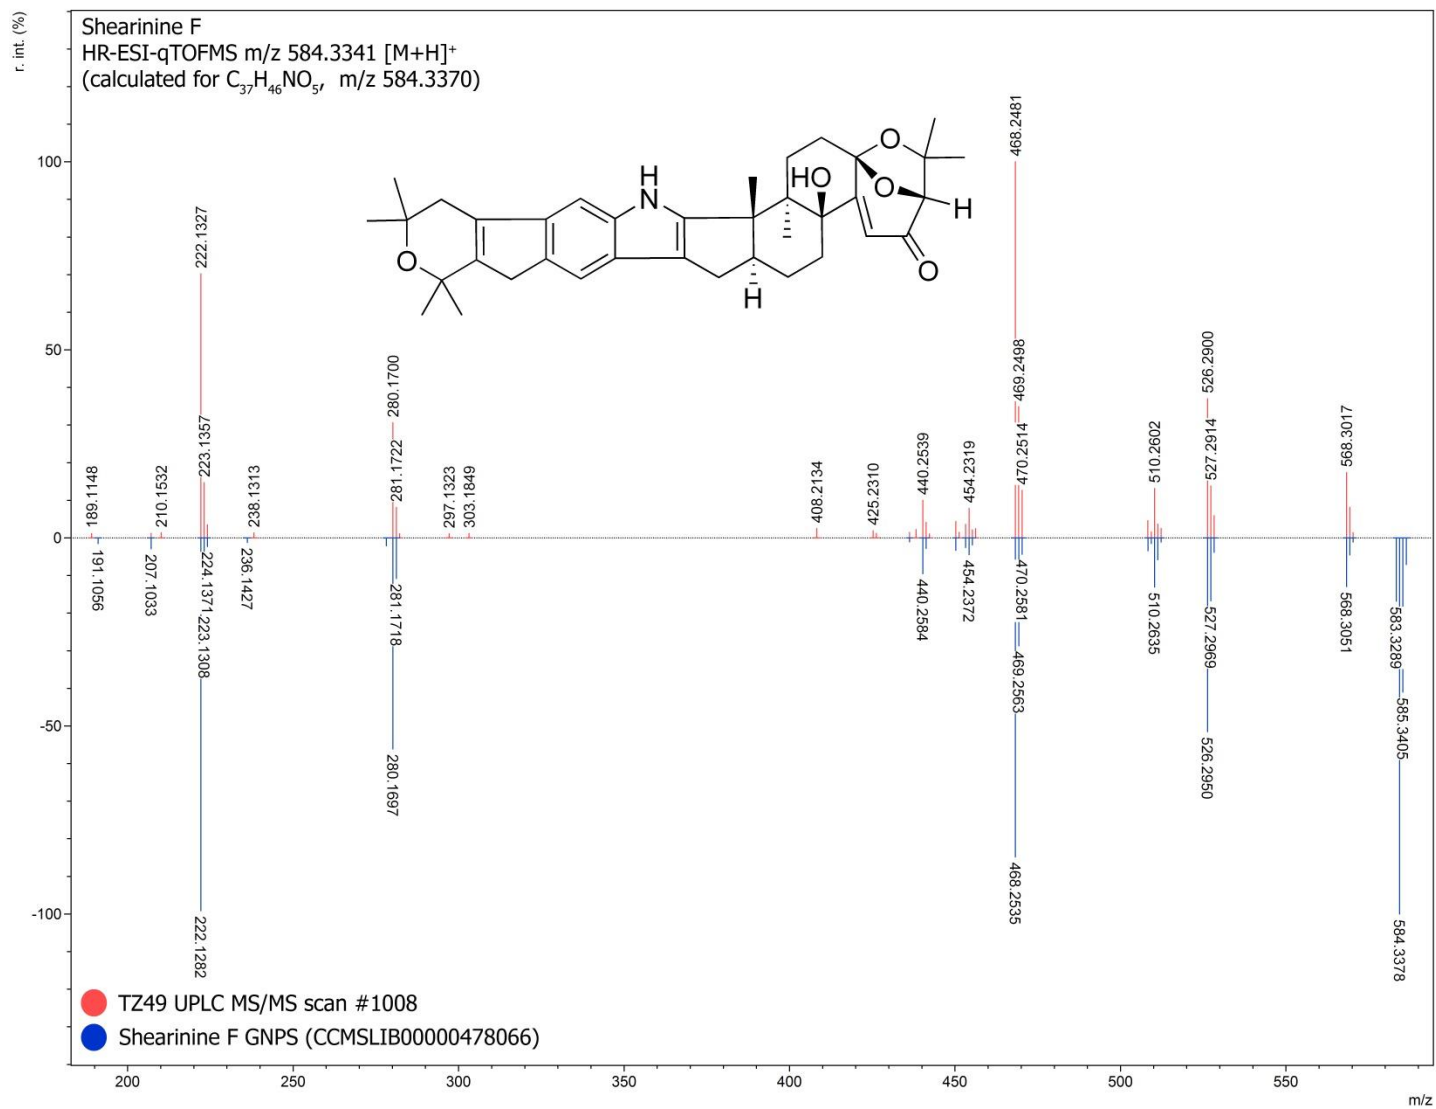

**Figure S11.** MALDI imaging mass spectrometry experiment of the interaction between the bacterium *Streptomyces* CBR38 and the fungus *Escovopsis* ACRO424, showing ions from 50 m/z to 2500 m/z

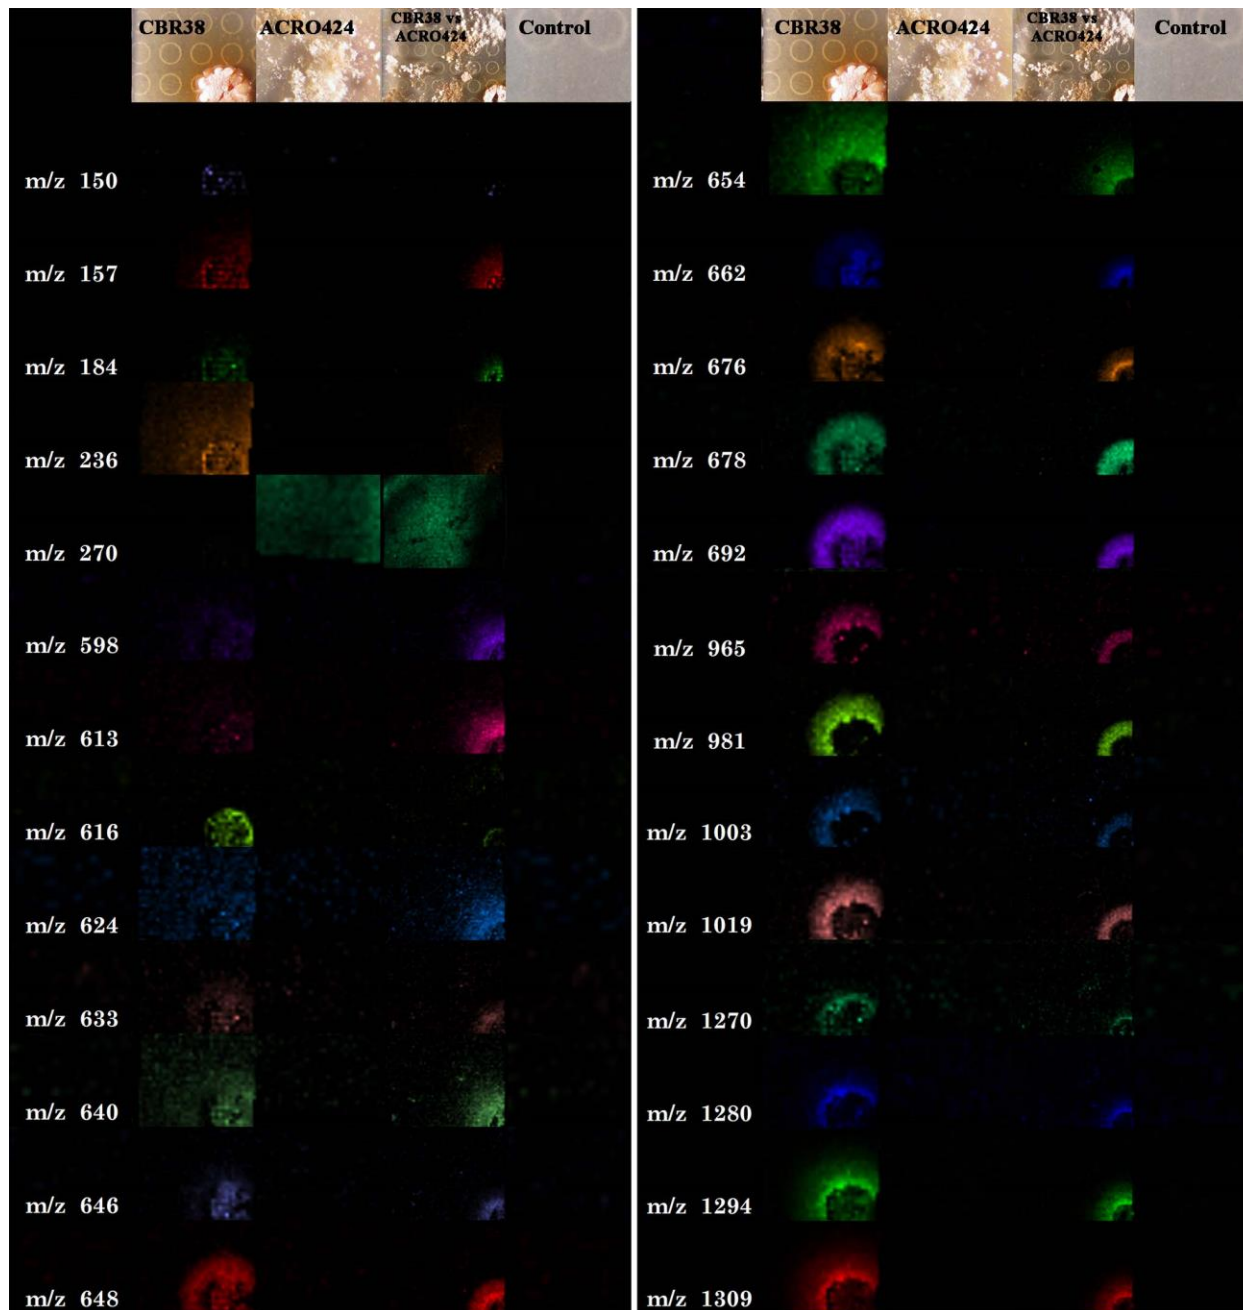



**Figure S12.** Direct MS-MS comparison of actinomycin D from the extract of *Streptomyces* CBR38 with actinomycin D gold spectrum from GNPS spectral library (CCMSLIB0000006871)

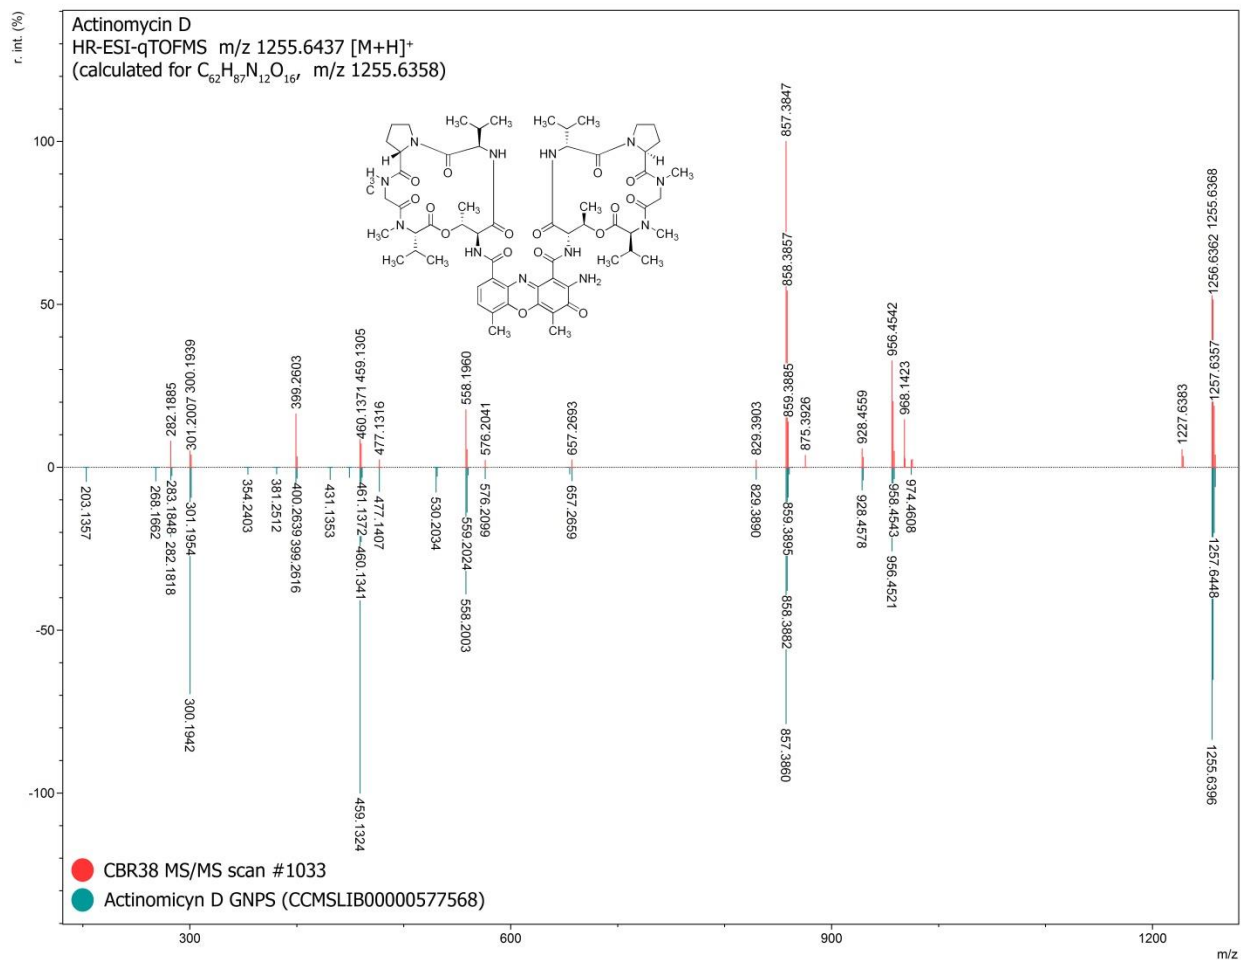

**Figure S13.** Direct MS-MS comparison of actinomycin X2 from the extract of *Streptomyces* CBR38 with actinomycin X2 gold spectrum from GNPS spectral library (CCMSLIB00000577607)

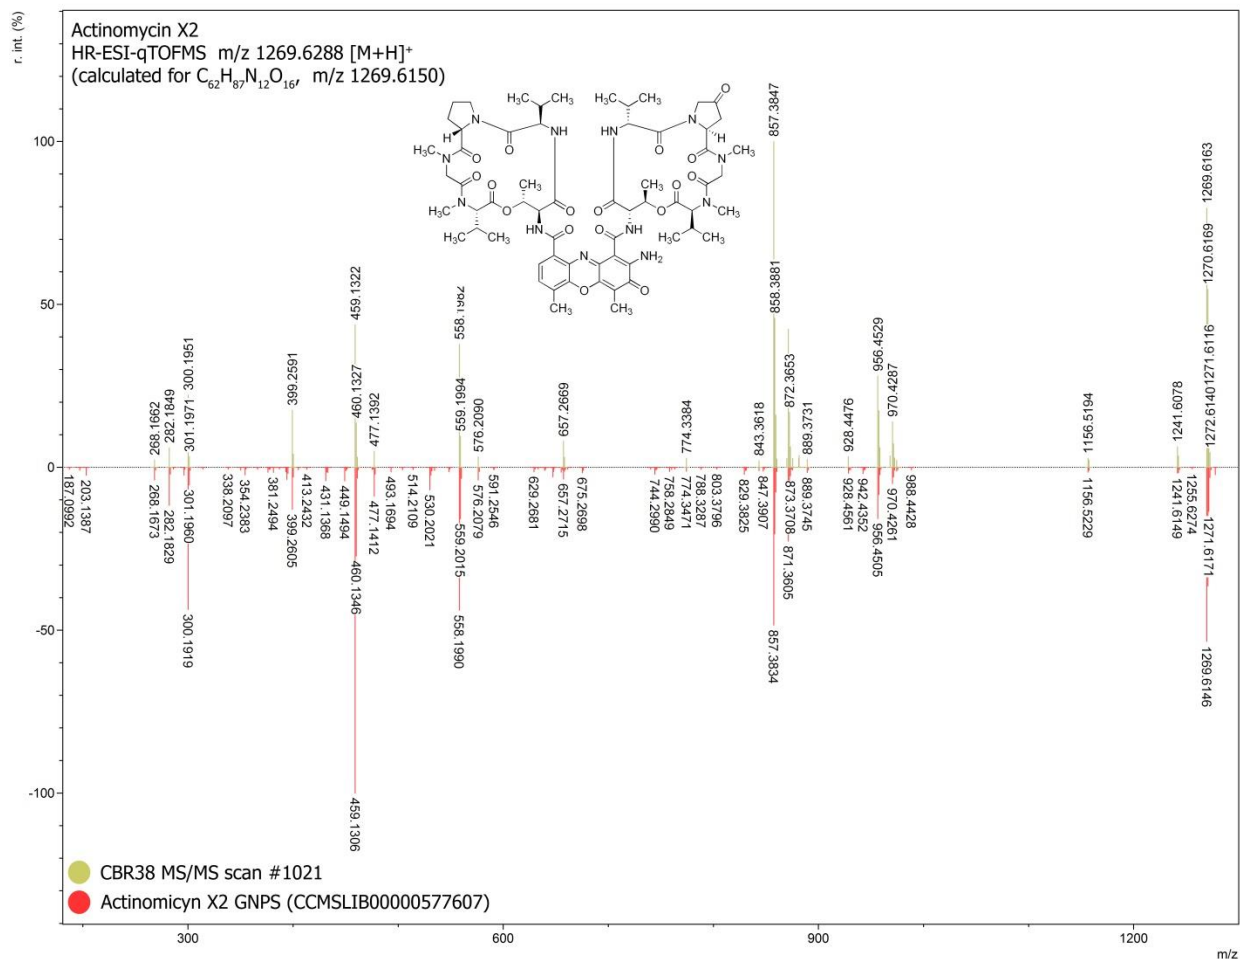

**Figure S14.** Direct MS-MS comparison of ion 1271.6415 with actinomycin X<sub>0β</sub> (CCMSLIB00000577768), result show twenty five shared peak (25) and less than 10 ppm of error for the calculated molecular formula.

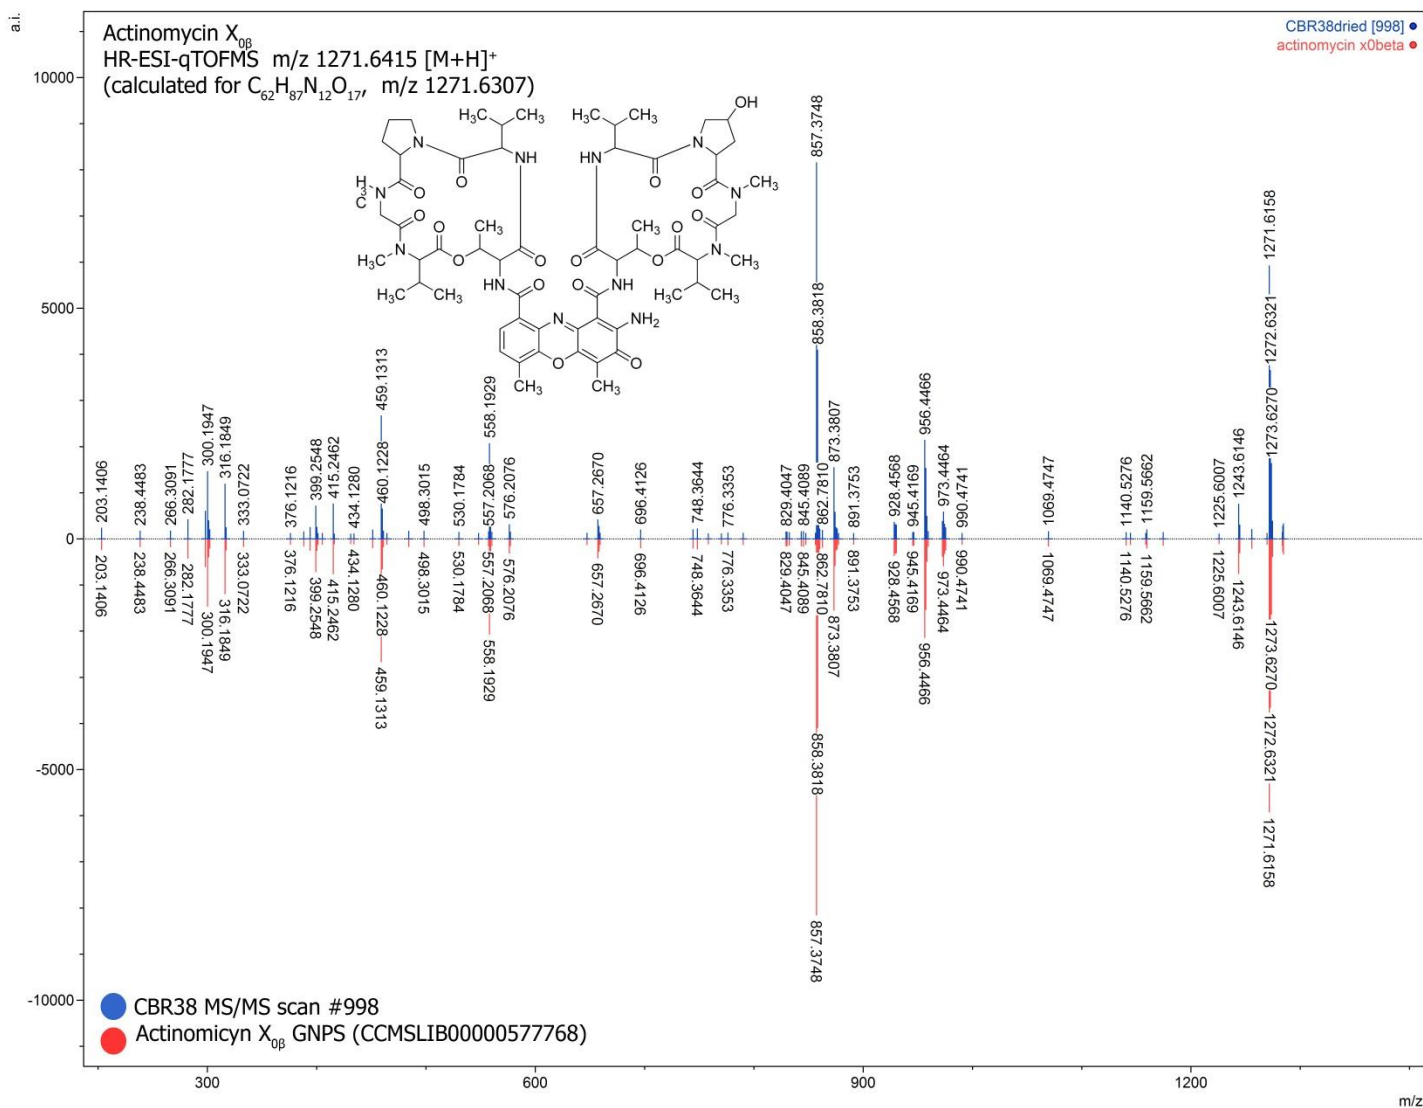

## Supplementary Table

**Table S1. Comparison of  $^{13}\text{C}$  and  $^1\text{H}$  NMR spectra of compound 1 (400 MHz, DMSO- $d_6$ ,  $\delta$  in ppm relative to solvent) and elaiophylin data from literature<sup>1</sup> (360 MHz, DMSO- $d_6$ ,  $\delta$  in ppm relative to internal TMS); Carbon numbers represent the lower and upper half portion of the molecule.**

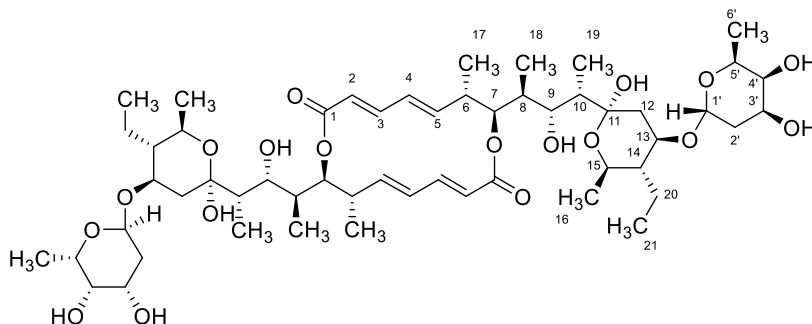

| Carbon | Compound 1, $\delta_c$ | Elaiophylin, $\delta_c$ | Compound 1, $\delta_H$ (m, J in Hz) | Elaiophylin $\delta_H$ (m, J in Hz) |
|--------|------------------------|-------------------------|-------------------------------------|-------------------------------------|
| 1      | 167.0966               | 167.22                  | -                                   | --                                  |
| 2      | 121.3408               | 121.33                  | 5.70 (d, $J=15.14$ )                | 5.66 (d, $J=15$ )                   |
| 3      | 144.8549               | 144.86                  | 6.82 (dd, $J=15.38, 10.99$ )        | 6.80 (dd, $J=15, 11$ )              |
| 4      | 130.5782               | 130.65                  | 6.11 (dd, $J=15.14, 11.23$ )        | 6.08 (dd, $J=15, 11$ )              |
| 5      | 144.8549               | 144.86                  | 5.64 (m)                            | 5.61 (dd, $J=16, 10$ )              |
| 6      | 41.1816                | 41.26                   | 2.50 (m)                            | 2.50 (m)                            |
| 7      | 75.8113                | 75.9                    | 5.09 (d, $J=10.25$ )                | 5.06 (d, $J=11$ )                   |
| 8      | 36.2769                | 36.31                   | 1.80 (m)                            | 1.82 (m)                            |
| 9      | 69.4062                | 69.53                   | 3.76 (m)                            | 3,70 (m)                            |
| 10     | 42.9404                | 42.82                   | 1.59 (m)                            | 1.6 (m)                             |
| 11     | 99.2291                | 99.19                   | --                                  | --                                  |
| 12     | 36.6180                | 36.98                   | 2.27 (m)                            | 2.27 (m)                            |
| 13     | 66.4224                | 66.42                   | 3.76 (m)                            | 3,70 (m)                            |
| 14     | 47.9491                | 48.05                   | 1.08 (d, $J=6.35$ )                 | 1.1 (m)                             |
| 15     | 65.8198                | 65.93                   | 3.76 (m)                            | 3,70 (m)                            |
| 16*    | 19.1800                | 19.14                   | 1.05 (d, $J=5.86$ )                 | 1.07 (m)                            |
| 17*    | 15.5370                | 15.49                   | 0.97 (d, $J=6.84$ )                 | 1.01 (d, $J=6$ )                    |
| 18     | 8.7940                 | 8.81                    | 0.81 (m)                            | 0.83 (d, $J=6$ )                    |
| 19     | 6.9848                 | 6.90                    | 0.81 (m)                            | 0.83 (d, $J=6$ )                    |
| 20     | 19.1800                | 19.14                   | 1.38 (d, $J=4.88$ )<br>1.61 (m)     | 1.41 (m)<br>1.60 (m)                |
| 21     | 9.5663                 | 9.47                    | 0.81 (m)                            | 0.83 (d, $J=6$ )                    |
| 1'     | 92.5197                | 92.68                   | 4.92 (d, $J=3.42$ )                 | 4.90 (d, $J=4\text{Hz}$ )           |
| 2'     | 32.6890                | 32.7                    | 1.40 (m);<br>1.80 (m)               | 1.41 (m)<br>1.82 (m)                |
| 3'     | 64.9420                | 65.04                   | 3.76 (m)                            | 3,70 (m)                            |
| 4'     | 70.2872                | 70.39                   | 3.38 (br. s.)                       | 3.36 (br.s.)                        |
| 5'     | 68.3556                | 68.56                   | 3.76 (m)                            | 3,70 (m)                            |
| 6'     | 17.1215                | 17.10                   | 1.07 (d, $J=6.35$ )                 | 1.07 (d, $J=6$ )                    |

\* Carbon numeration corrected established by COSY correlations and literature<sup>11,12</sup>

## Supplementary References

1. Kaiser, H. & Keller-Schierlein, W. Structure elucidation of elaiophylin: spectroscopic studies and degradation. *Helv. Chim. Acta* **64**, 407–424 (1981).
2. Higginbotham, S. J. *et al.* Bioactivity of fungal endophytes as a function of endophyte taxonomy and the taxonomy and distribution of their host plants. *PLoS One* **8**, e73192 (2013).
3. Trager, W. & Jensen, J. B. Human malaria parasites in continuous culture. *Science* **193**, 673–5 (1976).
4. Almanza, A., Coronado, L., Tayler, N., Herrera, L. & Spadafora, C. Automated synchronization of *P. falciparum* using a temperature cycling incubator. *Curr. Trends Biotechnol. Pharm.* **5**, 1130–1133 (2011).
5. Corbett, Y. *et al.* A novel DNA-based microfluorimetric method to evaluate antimalarial drug activity. *Am. J. Trop. Med. Hyg.* **70**, 119–24 (2004).
6. Martínez-Luis, S., Gómez, J. F., Spadafora, C., Guzmán, H. M. & Gutiérrez, M. Antitrypanosomal alkaloids from the marine bacterium *Bacillus pumilus*. *Molecules* **17**, 11146–55 (2012).
7. Díaz-Chiguer, D. L. *et al.* In vitro and in vivo trypanocidal activity of some benzimidazole derivatives against two strains of *Trypanosoma cruzi*. *Acta Trop.* **122**, 108–12 (2012).
8. Bonev, B., Hooper, J. & Parisot, J. Principles of assessing bacterial susceptibility to antibiotics using the agar diffusion method. *J. Antimicrob. Chemother.* **61**, 1295–1301 (2008).
9. Ericsson, H., Tunevall, G. & Wickman, K. The paper disc method for determination of bacterial sensitivity to antibiotics: relationship between the diameter of the zone of inhibition and the minimum inhibitory concentration. *Scand. J. Clin. Lab. Invest.* **12**, 414–422 (1960).
10. Mejia, L. C. *et al.* Endophytic fungi as biocontrol agents of *Theobroma cacao* pathogens. *Biol. Control* **46**, 4–14 (2008).
11. Nair, M. G. *et al.* Gopalamycin, an antifungal macrodiolide produced by soil actinomycetes. *J. Agric. Food Chem.* **42**, 2308–2310 (1994).
12. Nakakoshi, M., Kimura, K., Nakajima, N., Yoshihama, M. & Uramoto, M. SNA-4606-1, a new member of elaiophylins with enzyme inhibition activity against testosterone 5 alpha-reductase. *J. Antibiot. (Tokyo)*. **52**, 175–7 (1999).
